# Supplementary material for: Boosting hydrogen generation by anodic oxidation of iodide over Ni–Co(OH)2 nanosheet arrays
Source: Royal Society of Chemistry journal article supplement (doi:10.1039/d0na00847h), 2020-12-09
Supplement: d0na00847h1.pdf [file d0na00847h1.pdf]

**Boosting hydrogen generation by anodic oxidation of iodide over Ni-Co(OH)<sub>2</sub> nanosheet arrays**

Enlai Hu, Yue Yao, Yi Chen, Yuanjing Cui, Zhiyu Wang and Guodong Qian\*

State Key Laboratory of Silicon Materials, Cyrus Tang Center for Sensor Materials and Applications, Department of Materials Science and Engineering, Zhejiang University, Hangzhou, 310027 (China). E-mail: [gdqian@zju.edu.cn](mailto:gdqian@zju.edu.cn)

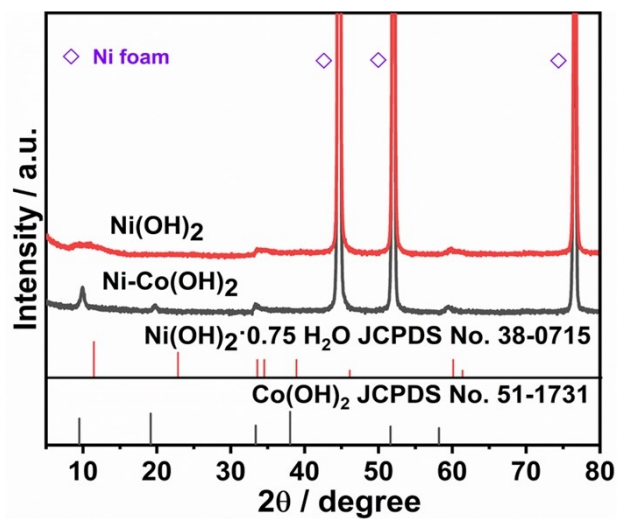

Figure S1. XRD patterns of Ni-Co(OH)<sub>2</sub> NSAs and Ni(OH)<sub>2</sub> NSAs.

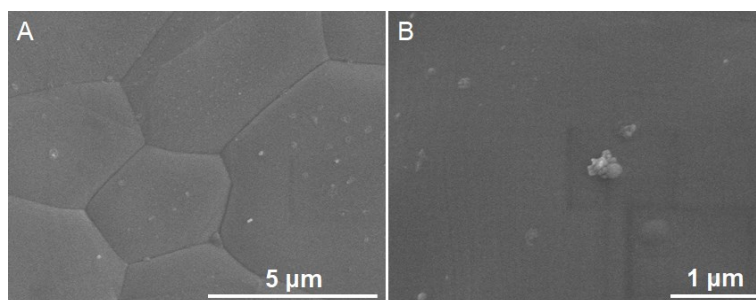

Figure S2. SEM images of pristine Ni foam substrate.

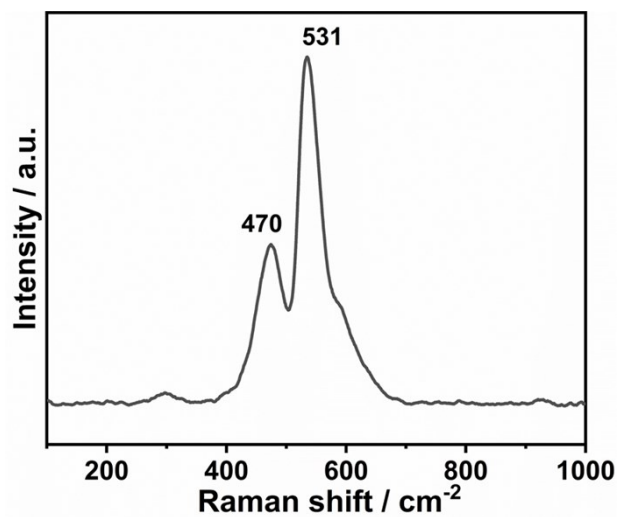

Figure S3. Raman spectra of the as-prepared Ni-Co(OH)<sub>2</sub> NSAs.

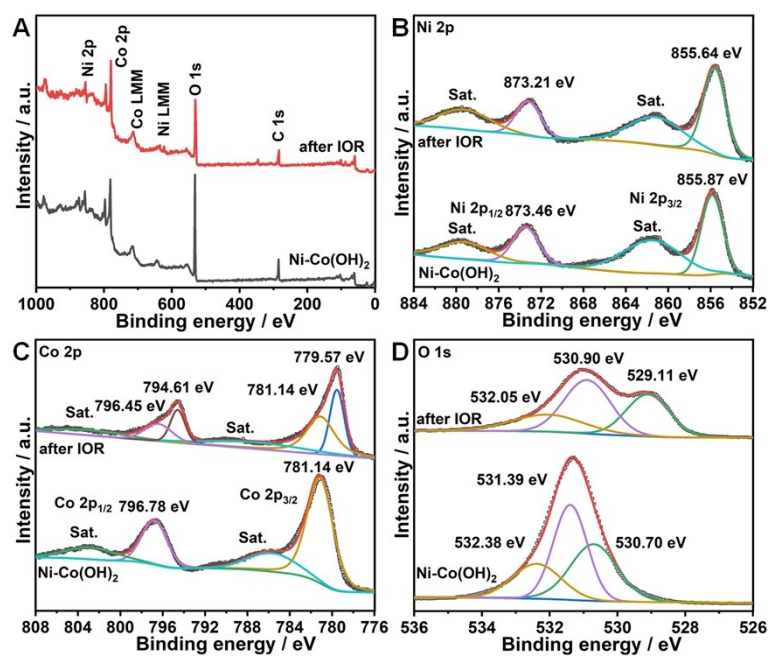

Figure S4. XPS survey spectra (A) and high-resolution XPS spectra of Ni 2p (B), Co 2p (C), and O 1s (D) of Ni-Co(OH)<sub>2</sub> NSAs before and after IOR performance.

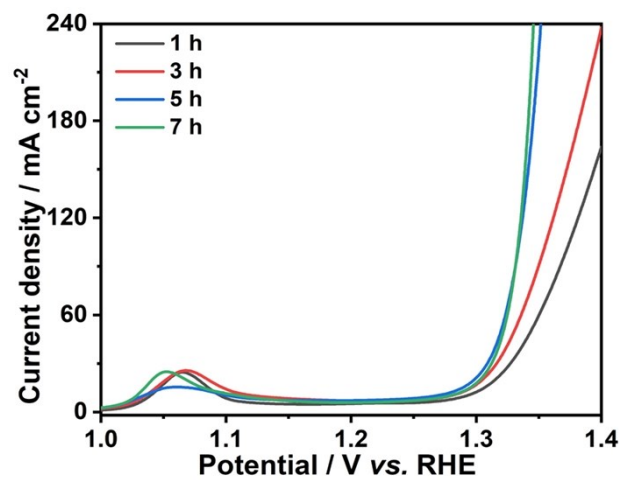

Figure S5. Polarization curves of IOR over Ni-Co(OH)<sub>2</sub> NSAs obtained at different time.

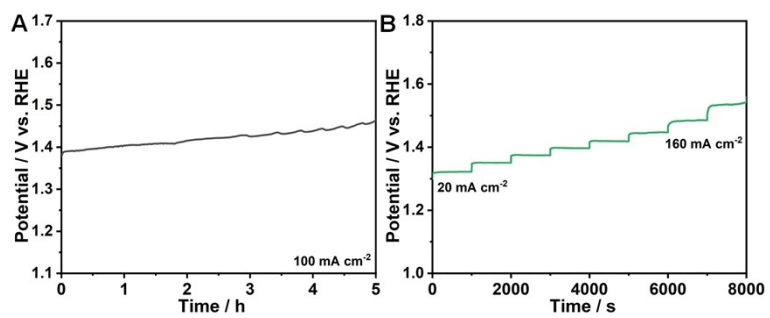

Figure S6. (A) Multi-current curve and (B) chronopotentiometry curve of Ni-Co(OH)<sub>2</sub> NSAs towards IOR.

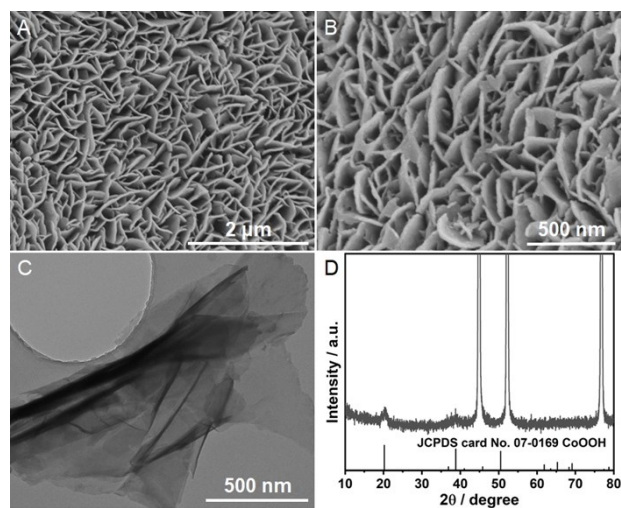

Figure S7. SEM (A,B), TEM (C) images and XRD pattern (D) of Ni-Co(OH)<sub>2</sub> NSAs after IOR.



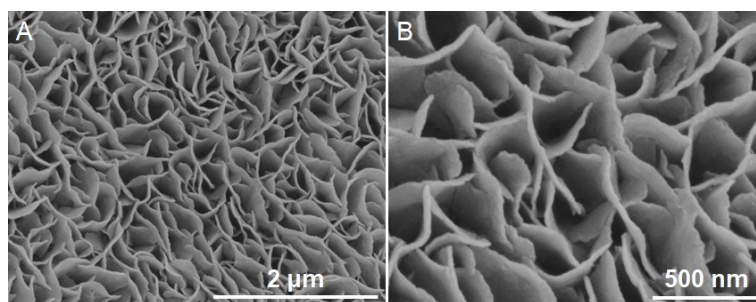

Figure S8. SEM images of Ni (OH)<sub>2</sub> NSAs.

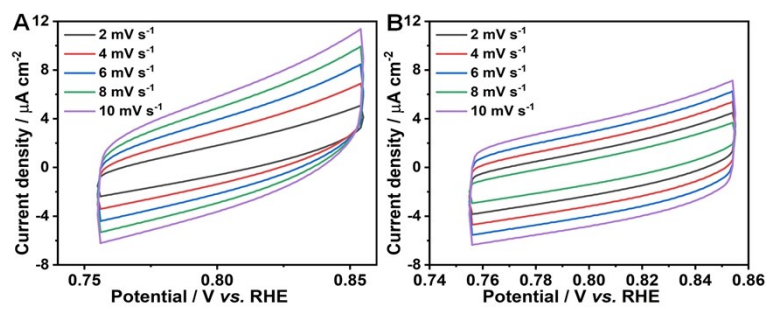

Figure S9. CV curves of Ni-Co(OH)<sub>2</sub> NSAs (A) and Ni(OH)<sub>2</sub> NSAs.

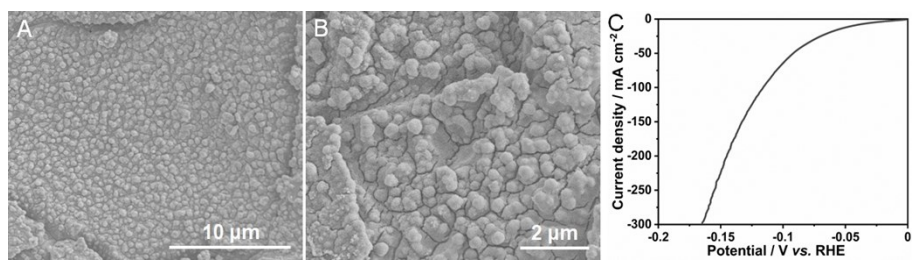

Figure S10. (A and B) FESEM images of Ni-Mo electrode, and (B) the corresponding polarization curve for HER.

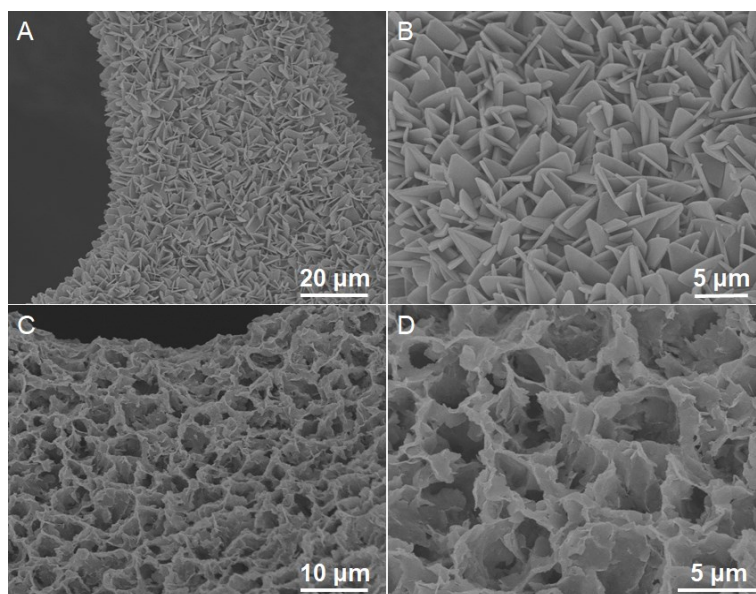

Figure S11. SEM images of ZIF-67 (A,B) and Co(OH)<sub>2</sub> NSAs (C,D).

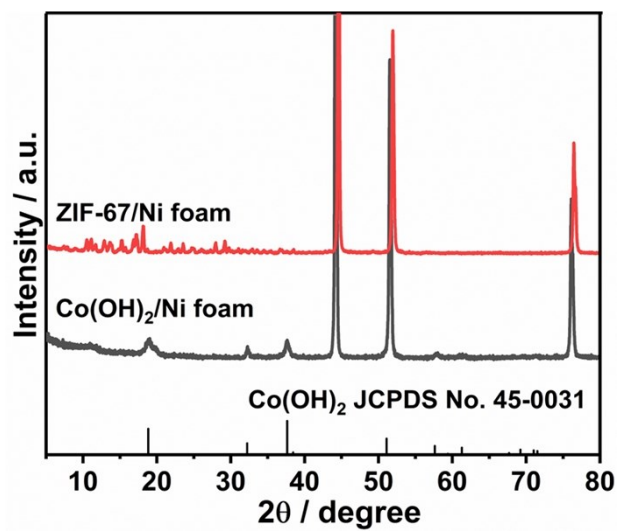

Figure S12. XRD patterns of ZIF-67 and Co(OH)<sub>2</sub> NSAs.

**Table S1.** Electrooxidation performance of the as-prepared catalyst compared with other documented electrocatalysts.

| electrocatalyst                                                | electrolyte               | potential<br>(V vs. RHE) | current density<br>(mA cm <sup>-2</sup> ) | stability@1<br>00 mA cm <sup>-2</sup> | references                                                          |
|----------------------------------------------------------------|---------------------------|--------------------------|-------------------------------------------|---------------------------------------|---------------------------------------------------------------------|
| CoFeCr<br>LDH/NF                                               | 1 M KOH +<br>0.33 M urea  | 1.305                    | 10                                        | 20 h                                  | <i>Appl. Catal. B</i> ,<br><b>2020</b> , 272, 118959.               |
| S-MnO <sub>2</sub>                                             | 1 M KOH +<br>0.5 M urea   | 1.33                     | 10                                        | N/A                                   | <i>Angew. Chem. Int. Ed.</i> ,<br><b>2016</b> , 55, 3804.           |
| Ni <sub>3</sub> N NA/CC                                        | 1 M KOH +<br>0.33 M urea  | 1.35                     | 10                                        | N/A                                   | <i>Inorg. Chem. Front.</i> ,<br><b>2017</b> , 4, 1120.              |
| MS-<br>Ni <sub>2</sub> P/Ni <sub>0.96</sub> S/NF               | 1 M KOH +<br>0.5 M urea   | 1.442                    | 100                                       | 20 h                                  | <i>ACS Appl. Mater.<br/>Interfaces</i> ,<br><b>2020</b> , 12, 2225. |
| FQD/CoNi-<br>LDH/NF                                            | 1 M KOH +<br>0.5 M urea   | 1.36<br>1.42             | 10<br>100                                 | N/A                                   | <i>Chem. Eng. J.</i> ,<br><b>2020</b> , 390, 124525.                |
| C-350                                                          | 1 M KOH +<br>0.5 M urea   | 1.337<br>1.402           | 10<br>100                                 | at least 30 h                         | <i>ACS Sustainable Chem.<br/>Eng.</i> , <b>2020</b> , 8, 7414.      |
| CoMn/CoMn <sub>2</sub> O <sub>4</sub>                          | 1 M KOH +<br>0.5 M urea   | 1.32<br>1.36             | 10<br>100                                 | N/A                                   | <i>Adv. Funct. Mater.</i> , <b>2020</b> ,<br>30, 2000556.           |
| NiIr-MOF/NF                                                    | 1 M KOH +<br>0.5 M urea   | 1.345<br>1.349           | 50<br>100                                 | N/A                                   | <i>Chem. Commun.</i> ,<br><b>2020</b> , 56, 2151.                   |
| MoS <sub>2</sub> /CoS/Co <sub>0.8</sub><br><sub>5</sub> Se HNT | 1 M KOH +<br>0.5 M urea   | 1.38                     | 50                                        | N/A                                   | <i>Nanoscale</i> ,<br><b>2020</b> , 12, 991.                        |
| NF/NiMoO-Ar                                                    | 1 M KOH +<br>0.5 M urea   | 1.37<br>1.42             | 10<br>100                                 | N/A                                   | <i>Energy Environ. Sci.</i> ,<br><b>2018</b> , 11, 1890.            |
| Ni <sub>x</sub> B                                              | 1 M KOH +<br>10 mM<br>HMF | 1.45                     | 100                                       | N/A                                   | <i>Angew. Chem. Int. Ed.</i> ,<br><b>2018</b> , 57, 11460.          |
| Ni <sub>2</sub> P NPA/NF                                       | 1 M KOH +<br>10 mM<br>HMF | 1.35<br>onset potential  | N/A                                       | N/A                                   | <i>Angew. Chem. Int. Ed.</i> ,<br><b>2016</b> , 55, 9913.           |
| NiCo <sub>2</sub> O <sub>4</sub>                               | 1 M KOH +<br>5 mM HMF     | 1.53                     | 14.83                                     | N/A                                   | <i>Appl. Catal. B</i> ,<br><b>2019</b> , 242, 85.                   |
| Ni <sub>3</sub> S <sub>2</sub> /NF                             | 1 M KOH +<br>10 mM<br>HMF | 1.35<br>onset potential  | N/A                                       | N/A                                   | <i>J. Am. Chem. Soc.</i><br><b>2016</b> , 138, 13639.               |
| Ni-Co(OH) <sub>2</sub><br>NSAs                                 | 1 M KOH +<br>0.33 M KI    | 1.30<br>1.32<br>1.33     | 20<br>50<br>100                           | 5 h                                   | This work                                                           |
| Co(OH) <sub>2</sub> NSAs                                       | 1 M KOH +<br>0.33 M KI    | 1.31<br>1.33<br>1.35     | 20<br>50<br>100                           | N/A                                   | This work                                                           |
